# Supplementary material for: Mineral and Metabolome Analyses Provide Insights into the Cork Spot Disorder on ‘Akizuki’ Pear Fruit
Source: MDPI journal article supplement (doi:10.3390/horticulturae9070818), 2023-07-16
Supplement: s1 [file s1]

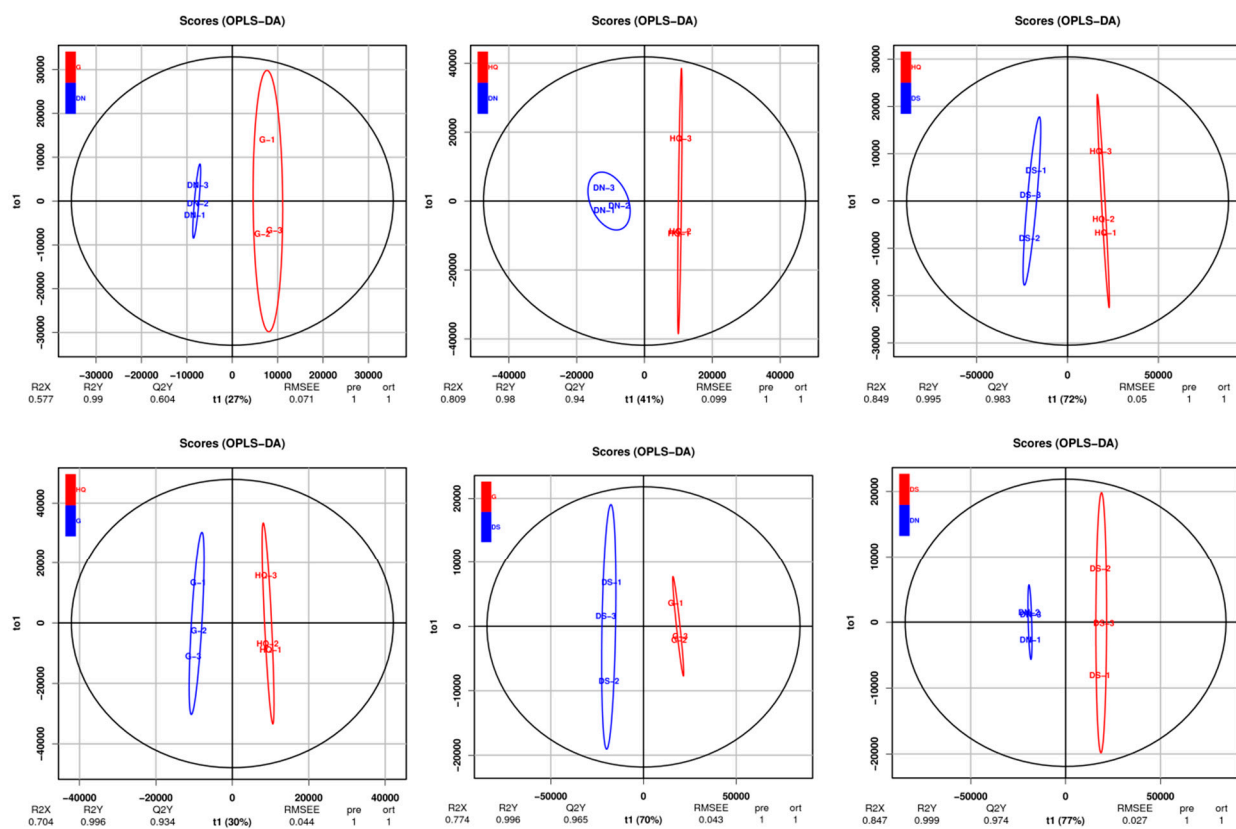

Figure S1 A supervised clustering analysis of different samples on their metabolite profiling.
